# Supplementary material for: FRC transplantation restores lymph node conduit defects in laminin α4–deficient mice
Source: PubMed Central journal article supplement (PMC10243809; doi:10.1172/jci.insight.167816), 2023-04-24
Supplement: jciinsight-8-167816-s019.pdf [file jciinsight-8-167816-s019.pdf]

**A** *Pdgfrβ*/ER-TR7/B220

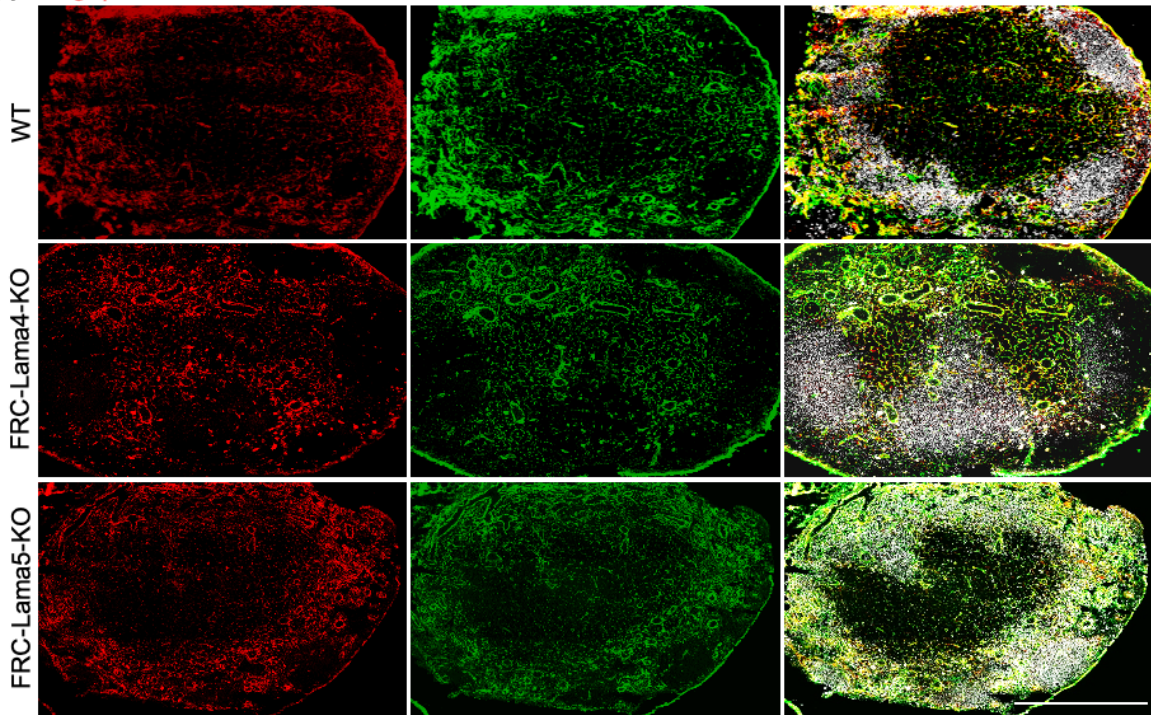

**B**

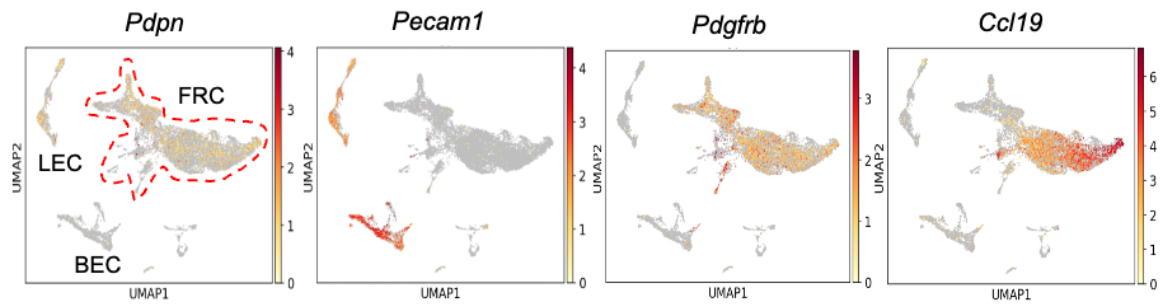

**C**

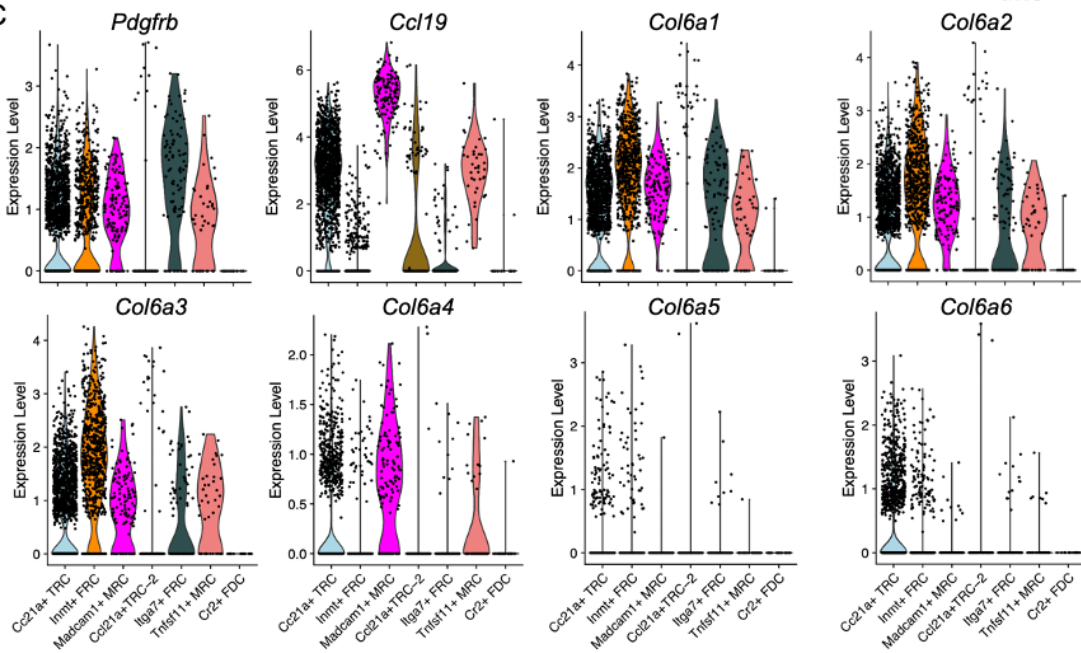

**Figure S1. Platelet-derived growth factor receptor  $\beta$  (PDGFR $\beta$ ) is stably expressed by FRCs.** LNs were isolated from *Pdgfrb-Cre<sup>-/-</sup>* x *Laminin  $\alpha$ 4<sup>fl/fl</sup>* (WT), *Pdgfrb-Cre<sup>+/-</sup>* x *Laminin  $\alpha$ 4<sup>fl/fl</sup>* (FRC-Lama4-KO), and *Pdgfrb-Cre<sup>+/-</sup>* x *Laminin  $\alpha$ 5<sup>fl/fl</sup>* (FRC-Lama5-KO) mice. **A:** Whole mount scanning (20x) of 6  $\mu$ m sections stained for *Pdgfr $\beta$* , ER-TR7, B220, scale bar 500  $\mu$ m. Representative of three independent experiments. 3 mice/group, 5 LNs/mouse, 3 sections/LN, 3-5 fields/section. **B:** *Pdpn*, *Pecam1*, *Pdgfrb*, and *Ccl19* gene expression in LN stromal cells, *Ccl19* and *Pdgfrb* are exclusively expressed by *Pdpn<sup>+</sup>Pecam1<sup>-</sup>* FRCs. **C:** *Pdgfrb*, *CCL19*, *Pdpn*, and *Col6a1-Col6a6* expression in FRC subsets. FRCs were further classified into two *Ccl21<sup>+</sup>* T zone reticular cells (TRCs), *N-methyltransferase (Inmt)<sup>+</sup>* FRCs, *Madcam1<sup>+</sup>* marginal reticular cells (MRCs), *integrin  $\alpha$ 7 (Itga7)<sup>+</sup>* FRCs, *tumor necrosis factor ligand superfamily member 11 (Tnfsf11)<sup>+</sup>* MRCs, and *complement receptor 2 (CR2)<sup>+</sup>* FDCs according to the expression of distinctive genes. Representative of three independent experiments. 3 mice/group, 5 LNs/mouse, 3 sections/LN, 3-5 fields/section.

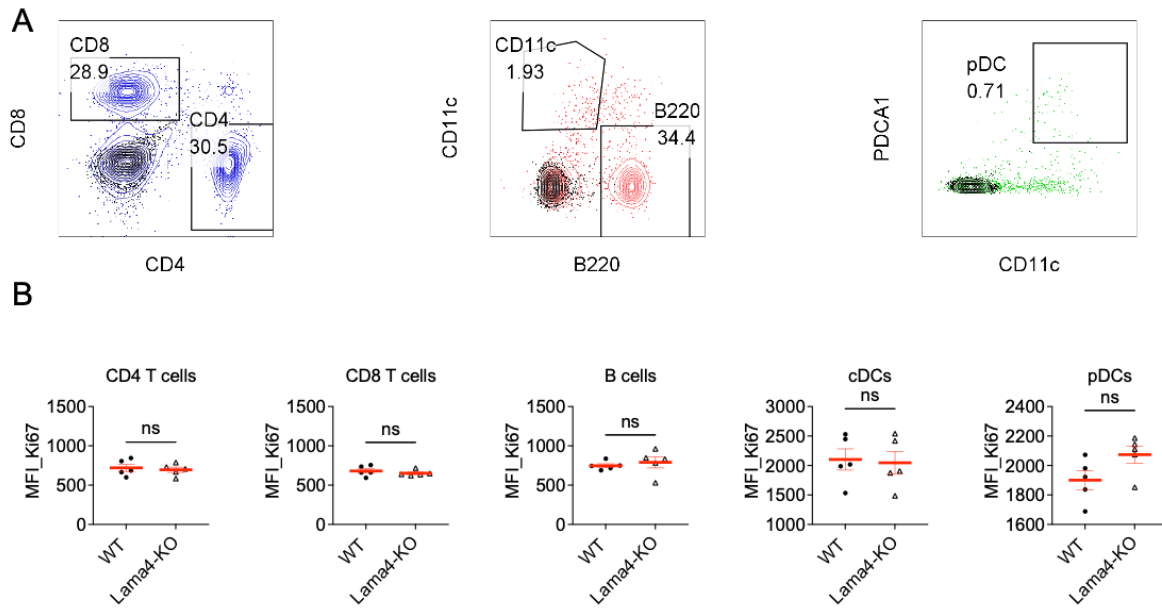

**Figure S2. Proliferation of freshly isolated leukocytes. A:** Gating of CD4 T cells, CD8 T cells, B cells, conventional dendritic cells (cDCs), and plasmacytoid DCs (pDCs) for flow cytometry. **B:** Ki67 intensity in these freshly isolated immune cells from WT and FRC-Lama4-KO LNs. Students' t-test for two groups comparison. Mean  $\pm$  SEM.

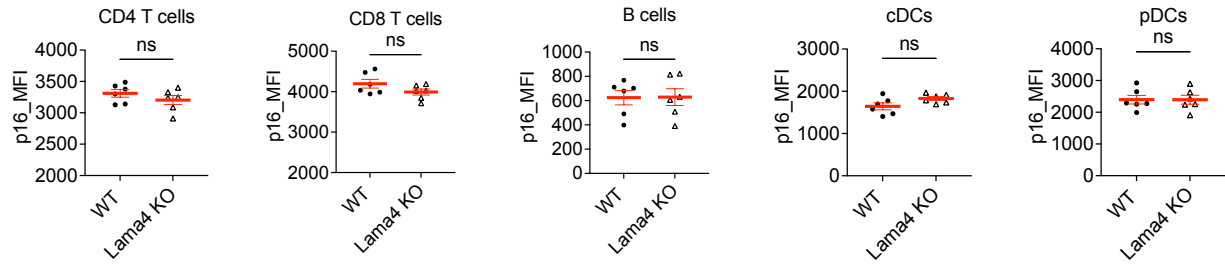

**Figure S3. Senescence of freshly isolated leukocytes.** Flow cytometry analysis of p16 expression in CD4 T cells, CD8 T cells, B cells, cDCs, and pDCs freshly isolated from WT, FRC-Lama4-KO, FRC-Lama5-KO LNs. Gating as in Fig. S2. Students' t-test for two groups comparison. Mean  $\pm$  SEM.

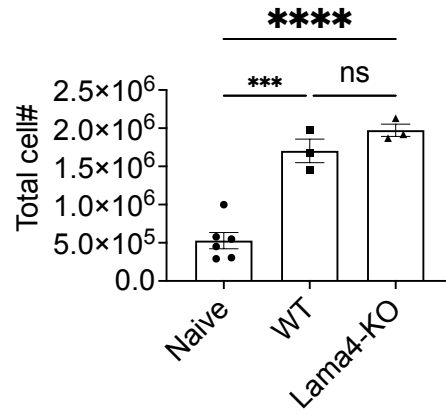

**Figure S4:** Mice were immunized in the flanks with IFA/OVA s.c.. Five days later, inguinal dLNs were harvested and total number of cells were quantified using flow cytometry. Representative data of two independent experiments, 3 mice/group. One-way ANOVA for multiple groups comparison. Mean  $\pm$  SEM, \*\*\*\* $p$ <0.0001.

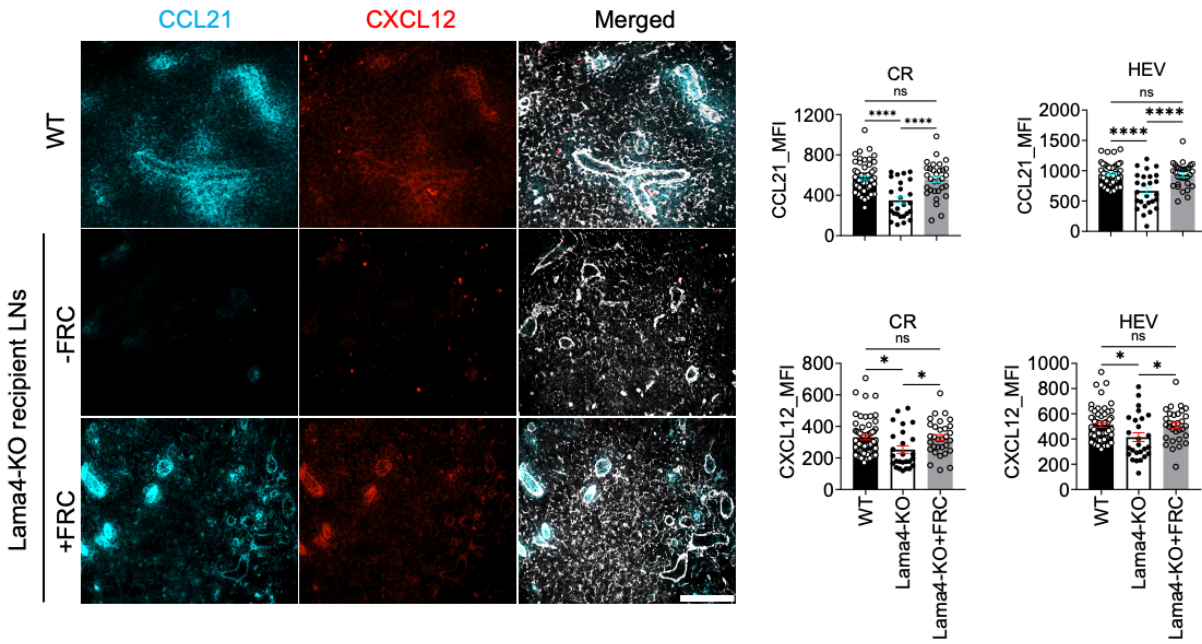

**Figure S5: Transferring WT FRCs recovers chemokine distribution in FRC-lama4-KO mice.** WT FRCs were injected (i.v.) into FRC-Lama4-KO mice ( $10^5$  FRCs/dose/week x 4 weeks). LNs from WT and FRC-Lama4-KO mice with or without FRC transfer were harvested for immunofluorescent staining for CCL21 and CXCL12. Scale bar 100  $\mu$ m. Representative of three independent experiments. 3 mice/group, 5 LNs/mouse, 3 sections/LN, 3-5 fields/section. One-way ANOVA with Tukey's multiple comparisons test for multiple groups comparison. Mean  $\pm$  SEM, \* $p < 0.05$ , \*\*\*\* $p < 0.0001$ .

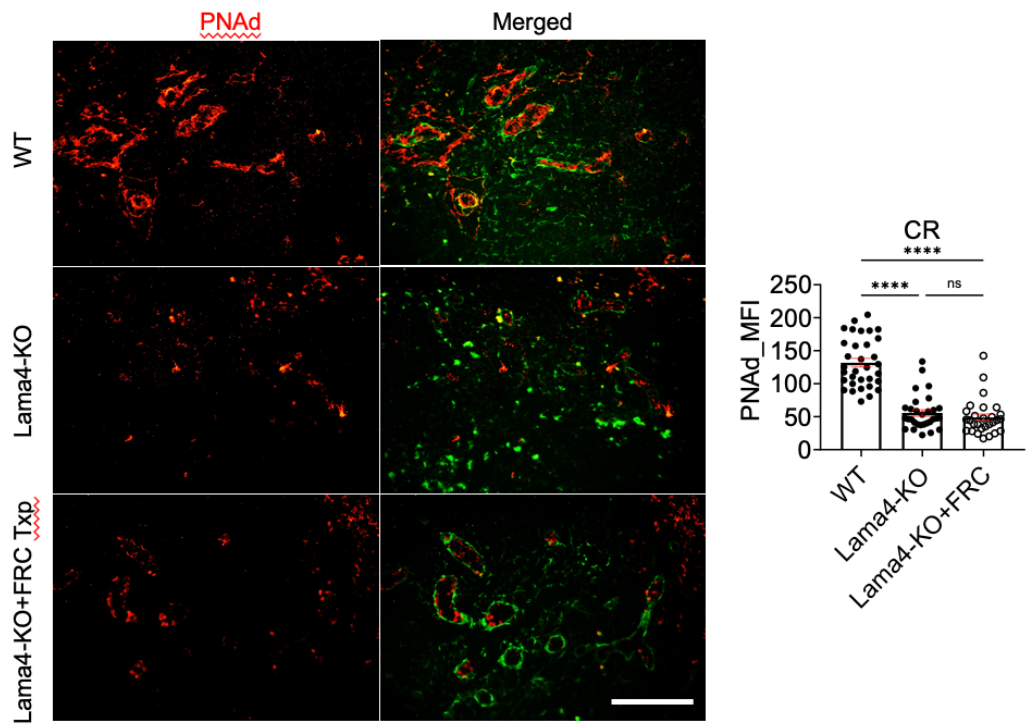

**Figure S6. Transfer of WT FRCs did not rescue the defect of HEVs in FRC-Lama4-KO mice.**  $10^5$  primary WT FRCs injected i.v. into WT and FRC-Lama4-KO mice, once a week for four weeks. One week after the 4<sup>th</sup> dose, LNs harvested. Left, cryosections stained for PNAAd and ER-TR7. Right, quantification of PNAAd intensity in cortical ridge (CR). One-way ANOVA for multiple groups comparison. Scale bar 100  $\mu$ m. Mean  $\pm$  SEM, \*\*\*\* $p < 0.0001$ .
